# Supplementary material for: A novel actinomycete, Streptomyces fugnipugnans sp. nov., with potent antifungal activity against Colletotrichum orbiculare
Source: Research Square preprint supplement (doi:10.21203/rs.3.rs-8168801/v1), 2025-11-24

**A novel actinomycete, *Streptomyces fugnipugnans* sp. nov., with potent antifungal activity against *Colletotrichum orbicular*e**

**Chuang Han1,2, Jia-Xin Song1, Yu-han Guo1, Xin-ying He1, Xian-cheng Zhang2, Xiao-dong Dai2, Jun-wei Zhao1,*****, Xiang-jing Wang1,***

1Key Laboratory of Agricultural Microbiology of Heilongjiang Province, Northeast Agricultural University, No. 59 Mucai Street, Xiangfang District, Harbin 150030, P.R. China

2National Collection of Edible Fungi (Heilongjiang), Institute of Microbiology, Heilongjiang Academy of Sciences, No. 68 Zhaolini Street, Daoli District, Harbin 150010, P.R. China

Corresponding author: Junwei Zhao and Wang Xiangjing

E-mail: [wangneau2013@163.com](mailto:wangneau2013@163.com), guyan2080@126.com/[zhaojunwei@neau.edu.cn](mailto:xiangwensheng@neau.edu.cn).

**Tab. S1.** The cultural characteristics of strain NEAU-S77T, *S. botrytidirepellens* NEAU-LD23T, *S. himastatinicus* ATCC 53653T and *S. amphotericinicus* 1H-SSA8T

| **Medium** | **Strain** | **Growth** | **Substrate mycelium** | **Diffusible pigment** |
| --- | --- | --- | --- | --- |
| **ISP1** | **1** | Good | Light Yellow | None |
| **2** | Good | Pale Yellow | None |
| **3** | Good | Light Yellowish Brown | None |
| **4** | Good | Light Orange | None |
| **ISP2** | **1** | Good | Dark Orange Yellow | None |
| **2** | Good | White | None |
| **3** | Good | Grayish Greenish Yellow | None |
| **4** | Good | Moderate Yellow | None |
| **ISP3** | **1** | Good | Strong Reddish Orange | None |
| **2** | Good | Pale Yellow | None |
| **3** | Good | White | None |
| **4** | Good | Grayish White | None |
| **ISP4** | **1** | Good | Pale Orange Yellow | None |
| **2** | Good | White | None |
| **3** | Good | White | None |
| **4** | Good | Grayish White | None |
| **ISP5** | **1** | Moderate | Light Yellow Green | Brilliant Yellow Green |
| **2** | Good | White | None |
| **3** | Good | Pale Greenish Yellow | None |
| **4** | Good | Yellowish White | None |
| **ISP6** | **1** | Good | Brilliant Orange Yellow | None |
| **2** | Good | Pale Yellow | None |
| **3** | Good | Pale Yellow | None |
| **4** | Good | Pale Orange Yellow | None |
| **ISP7** | **1** | Moderate | Strong Yellowish Brown | Light Yellow Brown |
| **2** | Good | Grayish Green | None |
| **3** | Good | White | None |
| **4** | Moderate | Greenish White | None |
| Bennett’s agar | **1** | Good | Light Orange Yellow | None |
| **2** | Good | Greenish White | None |
| **3** | Moderate | Pale Orange Yellow | None |
| **4** | Moderate | Light Orange Yellow | None |
| Czapek’s agar | **1** | Moderate | Light Orange Yellow | None |
| **2** | Good | White | None |
| **3** | Moderate | Moderate Orange Yellow | None |
| **4** | Moderate | Strong Orange | None |
| Nutrient agar | **1** | Good | Pale Orange Yellow | None |
| **2** | Good | Greenish White | None |
| **3** | Moderate | Pale Yellow | None |
| **4** | Moderate | Light Yellow | None |

Strains: 1, NEAU-S77T; 2, *S. botrytidirepellens* NEAU-LD23T; 3, *S. himastatinicus* ATCC 53653T; 4, *S. amphotericinicus* 1H-SSA8T.

**Tab. S2.** Cellular fatty acid composition of strain NEAU-S77T.

| **Fatty acid** | **NEAU-S77T** |
| --- | --- |
| Saturated |  |
| C13:0 | 2.4 |
| C14:0 | 16.9 |
| C15:0 | 15.1 |
| C16:0 | 20.9 |
| C17:0 | 3.4 |
| Branched |  |
| *anteiso*-C13:0 | 1.1 |
| *iso*-C14:0 | 2.2 |
| *anteiso*-C15:0 | 10.2 |
| *iso*-C16:0 | 19.2 |
| 10-methyl-C17:0 | 0.5 |
| *iso*- C18:0 | 4.1 |
| *iso*- C19:0 | 3.2 |
| Unsaturated |  |
| C18:1 *ω*7c | 0.5 |

Values are percentages of total fatty acids.

**Tab. S3.** Genome sequence features of strain NEAU-S77T and its closely related species

| **Features** | **NEAU-S77T** | **NEAU-LD23T** | **ATCC 53653T** |
| --- | --- | --- | --- |
| Bioproject | PRJNA1182490 | [PRJNA503497](https://www.ncbi.nlm.nih.gov/bioproject/PRJNA503497) | [PRJNA33605](https://www.ncbi.nlm.nih.gov/bioproject/PRJNA33605/) |
| Accession No. | [JBMGRD000000000](https://www.ncbi.nlm.nih.gov/nuccore/JBMGRD000000000" \o "GenBank WGS master accession) | RIBZ00000000 | ACEX00000000 |
| Sequencing Technology | Illumina HiSeq | Illumina HiSeq | PacBio |
| Assembly method | SOAPdenovo v. 2.04 | SOAPdenovo v. 2.04 | ABI |
| Genome coverage | 136.59x | 131.0x | 6.0x |
| Contigs | 275 | 887 | 783 |
| Genome size (Mb) | 9.95 | 11 | 11 |
| DNA GC content (%) | 71.54 | 71.5 | 71 |
| rRNAs | 7 | 6 | - |
| tRNAs | 66 | 67 | - |

-, no data.

**Tab. S4.** Secondary metabolite gene cluster of strain NEAU-S77T

| Type | Location | Similar gene clusters | Similarity（%） |
| --- | --- | --- | --- |
| RiPP-like | Scaffold1_1:123,762-133,986 | - | - |
| Scaffold4_2:38,032-49,336 | - | - |
| NAPAA | Scaffold1_1:179,104-213,054 | phthoxazolin | 6 |
| NRPS | Scaffold5_1:82,277-128,462 | - | - |
| Scaffold7_1:44,056-94,975 | Coelichelin | 90 |
| Scaffold20_2:1-61,413 | cinnamycin | 14 |
| Scaffold83_1:14,002-44,184 | Kutzneride 2 | 10 |
| Scaffold89_1: 285-38,587 | Ochronotic pigment | 50 |
| NRPS-like | Scaffold34_1:48,568-85,703 | echoside | 82 |
| NRPS-like, T1PKS | Scaffold3_1:1-200,978 | Mediomycin A | 68 |
| NRPS-like, T1PKS,terpene | Scaffold31_1:62,958-90,360 | 2-methylisoborneol | 100 |
| T1PKS | Scaffold8_1:3-76,444 | ML-449 | 75 |
| Scaffold14_1:70,775-118,644 | rifamycin | 7 |
| Scaffold16_1:1-69,629 | Sanglifehrin A | 13 |
| Scaffold48_1:1-44,221 | bafilomycin B1 | 55 |
| Scaffold67_1:3-53,454 | funisamine | 27 |
| Scaffold72_1:1-39,703 | meilingmycin | 8 |
| Scaffold74_1:1-49,415 | fostriecin | 28 |
| Scaffold82_1:22510-44,392 | nigericin | 61 |
| Scaffold94_1:1-36,118 | Piericidin A1 | 33 |
| Scaffold100_1:1-34,564 | naphthomycin A | 12 |
| Scaffold112_1:1-29,767 | nigericin | 83 |
| Scaffold126_2:1-23,535 | pladienolide B | 50 |
|  | Scaffold150_1:1-16,342 | Azalomycin F3a | 34 |
| Scaffold159_1:1-15,408 | stambomycin | 36 |
| Scaffold161_1:1-15,149 | - | - |
| Scaffold176_1:1-11,168 | - | - |
| Scaffold186_1:1-9,436 | - | - |
| Scaffold187_1:1-9,417 | Mediomycin A | 28 |
| Scaffold189_1:1-9,109 | - | - |
| Scaffold195_1:1-7,865 | - | - |
| Scaffold207_1:1-5,795 | Mediomycin A | 28 |
| Scaffold209_1:1-5,664 | Mediomycin A | 28 |
| Scaffold212_1:1-5170 | - | - |
| Scaffold213_1:1-5,159 | - | - |
| Scaffold216_1:1-4,598 | - | - |
| Scaffold221_1:1-3,931 | - | - |
| Scaffold222_1:1-3,730 | ECO-02301 | 30 |
| Scaffold225_1:1-3,615 | nanchangmycin | 32 |
| TIPKS, NRPS, PKS-like, butyrolactone | Scaffold13_1:3-112,291 | meilingmycin | 6 |
| TIPKS, pyrrolidine, butyrolactone, other | Scaffold38_1:1-78,108 | anisomycin | 92 |
| T2PKS | Scaffold19_1:28,172-100,696 | Spore pigment | 83 |
| T3PKS | Scaffold182_1:1-9,793 | [2-methoxy-5-methyl-6-(13-methyltetradecyl)-1,4-benzoquinone/2-methoxy-5-methyl-6-(13-methyltetradecyl)phenol](https://mibig.secondarymetabolites.org/go/BGC0000282.3" \t "C:/Users/admin/AppData/Local/Temp/BNZ.68664e755867ed7/_blank) | 100 |
| PKS-like, T1PKS | Scaffold41_1:15,924-75,155 | vicenistatin | 50 |
| siderophore | Scaffold6_1:143,735-155,522 | desferrioxamine B | 100 |
| Scaffold9_1:91,799-104,133 | ficellomycin | 3 |
| Scaffold52_1:58762-67,233 | - | - |
| terpene | Scaffold18_1:77,708-99,918 | - | - |
| Scaffold48_1:44,942-69,698 | isorenieratene | 71 |
| Scaffold62_1:40,964-57,166 | geosmin | 100 |
| Scaffold66_1:28,267-49,352 | pristinol | 100 |
| Scaffold98_1:1-24,983 | hopene | 69 |
| terpene, NRPS-like | Scaffold11_1:40,343-92,801 | livipeptin | 100 |
| lassopeptide | Scaffold64_1:22,574-45,139 | SSV-2083 | 18 |
| Lanthipeptide-class-ii,NRPS,T1PKS | Scaffold8_1:121,989-156,654 | Surugamide A/Surugamide D | 8 |
| Lanthipeptide-class-iii | Scaffold33_1:69,647-88,659 | catenulipeptin | 60 |
| phenazine | Scaffold10_2:1-11,221 | streptophenzaine | 21 |
| ectoine | Scaffold140_1:6,818-17,222 | ectoine | 100 |
| redox-cofactor | Scaffold24_1:20,159-42,253 | lankacidin | 26 |
| ladderane, arylpolyene | Scaffold25_1:63,180-97,940 | atratumycin | 34 |
| transAT-PKS | Scaffold30_1:1-56,481 | 9-methylstreptimidone | 77 |
| transAT-PKS, NRPS, T1PKS | Scaffold77_1:1-47,750 | phthoxazolin | 6 |
| transAT-PKS-like, NRPS | Scaffold128_1:1-23,999 | phthoxazolin | 4 |
| RRE-containing | Scaffold32_1:13,265-35,640 | granaticin | 10 |
| hglE-KS, T1PKS | Scaffold49_1:34,375-68,636 | - | - |
| butyrolactone | Scaffold132_1:2,770-13,708 | - | - |

-, no data.

**Tab. S5.** Antifungal activity of strain NEAU-S77T against eleven tested fungi

| **Tested fugus** | **Inhibition rate (%)** |
| --- | --- |
| *Colletotrichum orbiculare* | 65.9±1.5 |
| *Fusarium oxysporum* | 45.9±1.6 |
| *Verticillium dahliae* | 45.6±1.0 |
| *Botrytis cinerea* | 41.2±1.9 |
| *Exserohilum turcicum* | 61.5±2.5 |
| *Bipolaris maydis* | 64.8±1.9 |
| *Thanatephorus cucumeris* | 52.5±1.5 |
| *Fusarium fujikuroi* | 63.5±0.9 |
| *Fusarium oxysporium Schelcht* | 47.5±0.3 |
| *Phytophthora sojae* | 47.2±1.3 |
| *Fusarium graminearum schw* | 60.9±2.1 |

**Fig. S1.** The phospholipids of strain NEAU-S77T

a, Using molybdenum blue reagent; b, Using anisaldehyde reagent; c, Using molybdophosphoric acid reagent; d, Using ninhydrin reagent. Abbreviations: DPG, diphosphatidylglycerol; PME, phosphatidyl methyl ethanolamine; PE, phosphatidyl ethanolamine; PI, phosphatidylinositol; PIM, phosphatidylinositol mannoside.

1st dimension: Chloroform: Methanol: Water (65:25:4, v/v);

2nd dimension: Chloroform: Acetic acid: Methanol: Water (80:18:12:5, v/v).

**
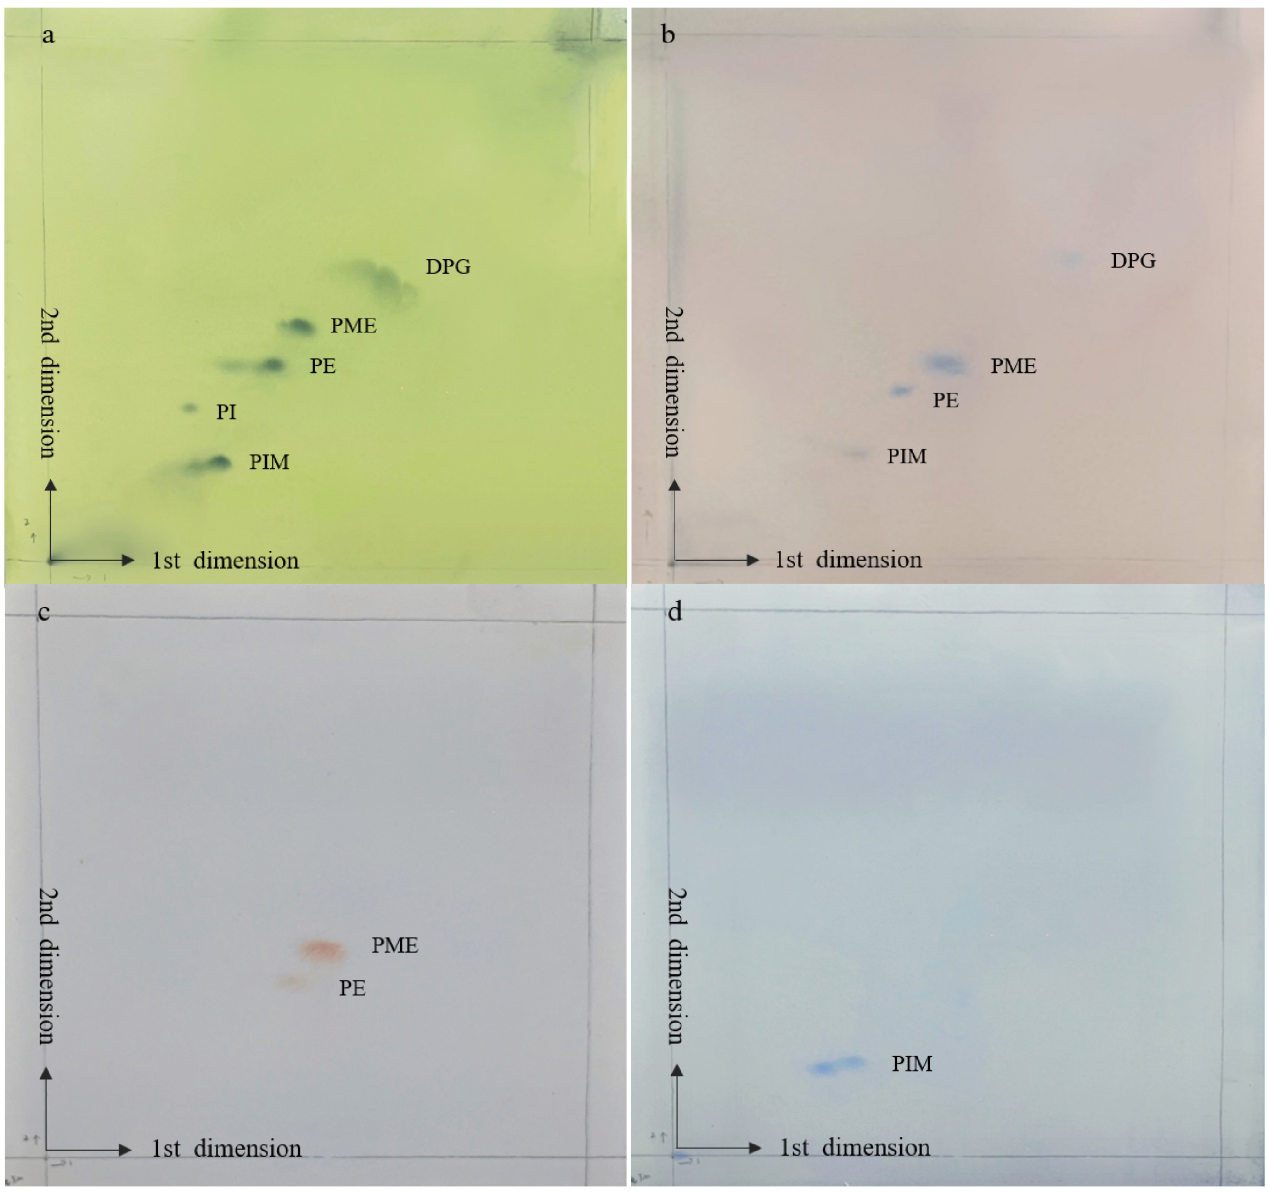
**

**Fig. S2.** The menaquinone of strain NEAU-S77T


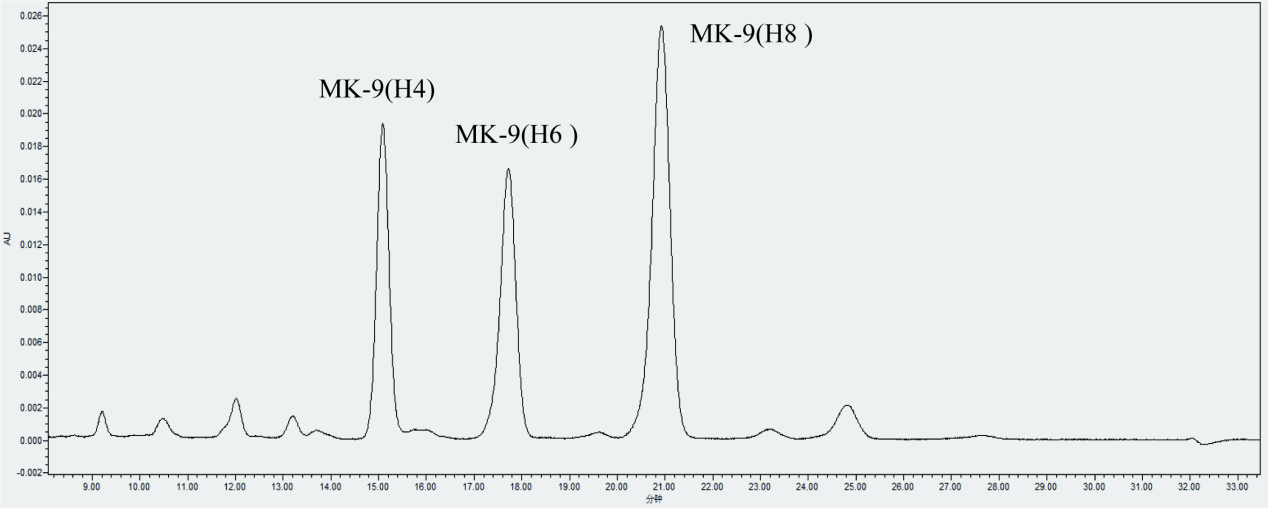


**Fig. S3.** Neighbour-joining tree based on 16S rRNA gene sequences showing the relationships between strain NEAU-S77T and related taxa. Only bootstrap values above 50 % (percentages of 1000 replications) are indicated. *Kitasatospora setae* KM-6054Twas used as an out-group*.* Bar, 0.0050 nucleotide substitutions per site


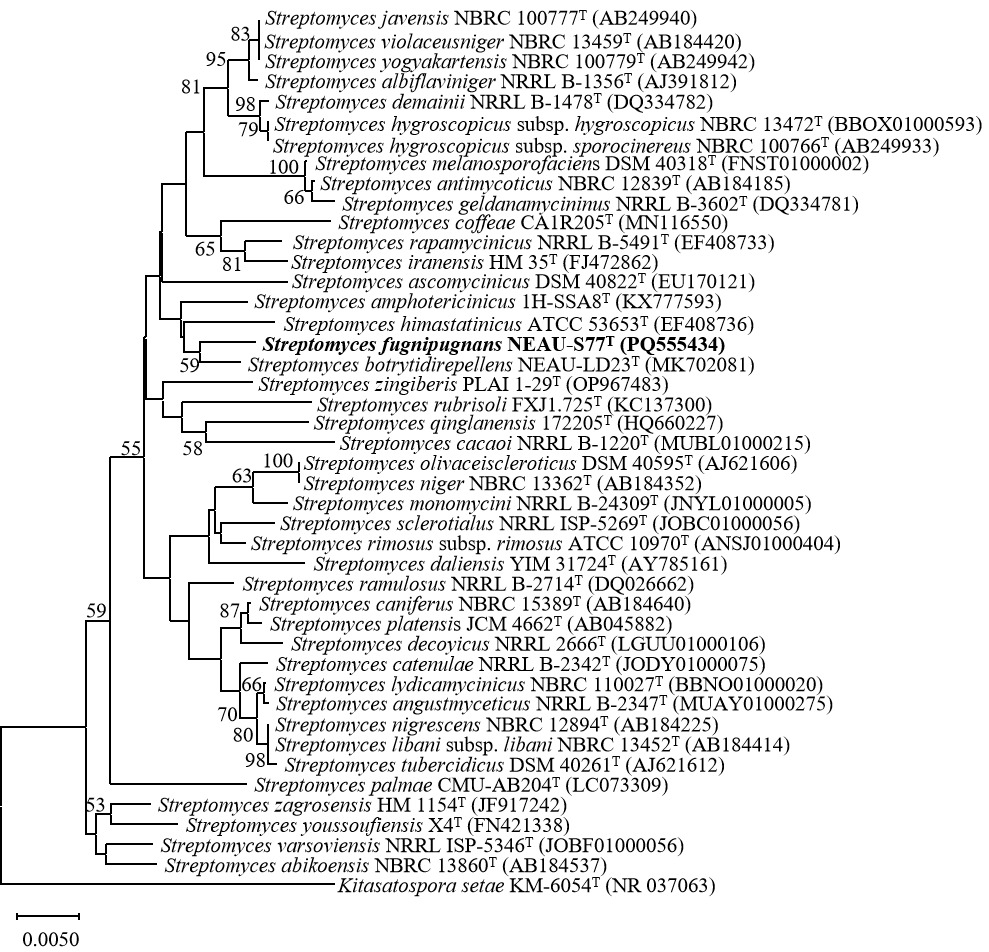


**Fig. S4.** Maximum Parsimony tree based on 16S rRNA gene sequences showing the phylogenetic position of strain NEAU-S77T. *Kitasatospora setae* KM-6054Twas used as an out-group*.* Only bootstrap values above 50 % (percentages of 1000 replications) are indicated.


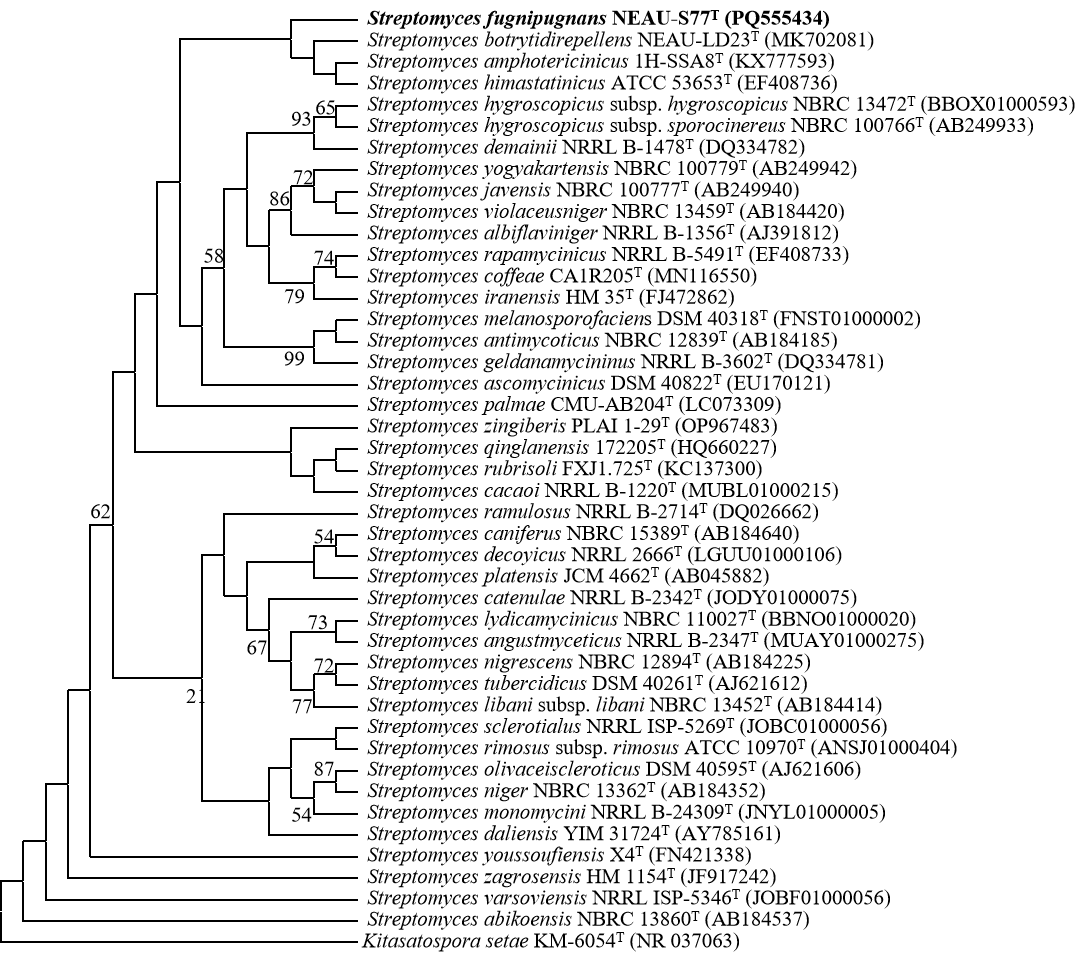

Supplement: Supplementary file 1 [file ba74d7a6969b423c3ee3a4fa.docx]
